# Supplementary material
Source: PubMed Central journal article supplement (PMC4329413)
Supplement: hep0061-0548-sd1.pdf [file hep0061-0548-sd1.pdf]

## ONLINE SUPPLEMENT

### Author Contributions

**Joshua Harrill**—experimental designs; performed the experiments; prepared all drafts of the manuscript and with LM Reid the final version of the manuscript.

**Bethany Parks**—helped with the cultures and with the high content image analyses.

**Eliane Wauthier**—helped with the cultures and with development of the culture conditions for the rat hepatic stem cells versus hepatoblasts

**Craig Rowlands**—helped with the experimental design in terms of choices of AHR agonists and analyses of the AHR.

**Rusty Thomas**—experimental designs especially for the toxicological studies; helped with editing of the manuscript; funding of the studies

**Lola Reid**—experimental designs; determined the conditions for cultures of stem cells versus hepatoblasts and helped with the analyses of stem/progenitor cell properties; helped with all drafts of the manuscript especially the final rounds of editing to prepare the manuscript for submission for publication and with all drafts for the revision; funding of the studies

### Abbreviations

**AFP**, alpha-fetoprotein; **AHR**, aryl hydrocarbon receptor; **ARNT**, aryl hydrocarbon receptor nuclear translocator; **AHRR**, aryl hydrocarbon receptor repressor; **bHLH/PAS**, basic-helix-loop-helix/Per-ARNT-Sim transcription factor;; **CD133**, prominin 1; **CS-PG**, chondroitin sulfate proteoglycan; **CXCR4**, CXC-chemokine receptor 4; **CYP450**, Cytochrome p450s; **DIM**, 3-3'-diindolylmethane; **DREs**, dioxin-response elements; **DS-PG**, dermatan sulfate proteoglycan; **EGF**, epidermal growth factor; **EpCAM**, epithelial cell adhesion molecule; **FBS**, fetal bovine

1 serum; **FICZ**, 6-formylindolo-[3,2-b]carbazole; **GAGs**, glycosaminoglycans; **HA**, hyaluronan;  
2 **HB**, human hepatoblast; **HDM**, serum-free, hormonally defined medium; **HEP**, hepatocyte;  
3 **HGF**, hepatocyte growth factor; **HpSC**, hepatic stem cells; HSP90/AIP/p23, heat shock protein  
4 90/AJP/23 multiprotein chaperone complex; **HS-PG**, heparan sulfate proteoglycan; **ICAM1**,  
5 intercellular adhesion molecule-1; **KM**, Kubota's Medium, a serum-free medium designed for  
6 endodermal stem/progenitors; **LIF**, leukemia inhibitory factor; **LGR5**, leucine-rich repeat-  
7 containing G protein coupled receptor 5 ; **NCAM**, neural cell adhesion molecule; **PBG**,  
8 peribiliary gland; **SALL4**, Sal-like protein 4; **SMA**, alpha-smooth muscle actin; **SOX**, Sry-  
9 related HMG box; **TCDD**, 2,3,7,8-tetrachlorodibenzodioxin; **VEGF**, vascular endothelial cell  
10 growth factor.

11

12

1 **Phenotypic Properties (Biomarkers) for Lineage Stages of Parenchymal Cells.** Below is  
2 given a summary regarding lineage-dependent properties of parenchymal cells in mammalian  
3 biliary trees and livers, with a focus on early lineage stages in rat livers. The information on the  
4 biliary tree stem cell populations is entirely from human studies, since these populations in rats  
5 and mice have yet to be characterized. The statements paraphrase those from refereed articles  
6 and reviews on biliary tree stem cells, hepatic stem cells and hepatoblasts and on their  
7 mesenchymal partners. These statements are presented in tabular form in **Table S3**. An  
8 especially succinct summary is given regarding the adult descendants of the stem progenitors:  
9 the plates of hepatocytes, cholangiocytes and mesenchymal cells found within the acinus from  
10 the periportal to pericentral zones; for more details, see the articles and reviews referenced (1-  
11 13)

12 All tissues are organized as partnerships between epithelial and mesenchymal cells  
13 and, in parallel, in maturational lineages of these partners going from stem cells,  
14 transitioning through intermediates, to lineage stages of adult cells, and finally to apoptotic  
15 cells. The stem cell niches contain stem cells, multipotent and with self-replicative ability, and  
16 committed progenitors, unipotent cells that are highly proliferative but without an ability for self-  
17 replication. The stem cells give rise to daughter cells, maturing step-wise with lineage-  
18 dependent cell size, morphology, ploidy, proliferative potential, antigenic profile and tissue-  
19 specific gene expression. The lineage kinetics and tissue turnover rates are tissue-specific  
20 and correlate inversely with the extent of polyploidy. Fetal and neonatal liver tissues are entirely  
21 diploid. The transition to adult ploidy profiles in liver occurs within 3 weeks in mice; within 4  
22 weeks in rats; and by late teenage years in humans; and the extent of polyploidy increases with  
23 age. The profile is distinct in different species. For example, adult human livers are mostly  
24 diploid (>80%) and with the remainder being tetraploid (10-20%). By contrast, adult rat livers at  
25 4 weeks of age are ~10% diploid, ~80% tetraploid, and ~10% octaploid. In all mammalian

1 species the diploid cells within the liver acinus are found periportally transitioning to polyploid  
2 cells near to the central vein (and in rodent species, polyploid cells are also mid-acinar). Ploidy  
3 profiles of the extrahepatic biliary tree cells have yet to be studied.

4         The maturational lineages for liver (and for pancreas) begin in the biliary tree near the  
5 duodenum in the hepato-pancreatic common duct, the site of the highest numbers of very  
6 primitive stem cells. The path of the maturational lineages is along the biliary tree and parallels  
7 that found in developing liver and pancreas. The stem cell niches in most of the biliary tree  
8 are peribiliary glands (PBGs) found within the walls of the bile ducts (intramural PBGs) or  
9 tethered to the duct walls (extramural) (10); the exception is in the gallbladder that has no  
10 PBGs and in which the niches are organized more like those in the intestine with crypts that  
11 connect to villi(14). These PBGs connect into the intra-hepatic stem cell niches, the canals of  
12 Hering(15), located periportally in the liver acini, and into the intra-pancreatic niches,  
13 pancreatic duct glands (PDGs), comprised entirely (or almost entirely) of committed  
14 progenitors(16).

15         There are multiple subpopulations of biliary tree stem cells (BTSCs) with the most  
16 primitive ones being in PBGs near the fibromuscular layers within bile ducts; transitioning to  
17 intermediates and then to mature cells with location of the PBGs nearing to the lumen of the  
18 bile ducts(16, 17). The earliest stages of these lineages (those near the fibromuscular layers)  
19 consist of cells that strongly express endodermal transcription factors (SOX9, SOX17, PDX1),  
20 pluripotency genes (e.g. OCT4, SOX2, KLF4, NANOG), various other stem cell markers (e.g.  
21 CD44, CD133, hedgehog proteins, aldehyde dehydrogenase-ALDH, SALL4), but with no  
22 expression of LGR5 or EpCAM or of mature markers (either hepatic or pancreatic) (10, 14-17).  
23 Intermediate stages of biliary tree stem cell populations express some but not all of the  
24 endodermal transcription factors (e.g. SOX9 and either SOX17 or PDX1 but not both); lower  
25 levels of the pluripotency genes and stem cell markers; CD44, LGR5 and EpCAM, but still not

1 mature cell markers. With increasing proximity to the lumens of the bile ducts, the stem cell  
2 traits fade, and mature markers appear and increase in level of expression. If the  
3 microenvironment is near the liver, the mature markers that emerge are hepatic; if near the  
4 pancreas, the mature markers are pancreatic; and in-between, they are bile duct. The  
5 mesenchymal cell partners of the now at least 3 major stages of biliary tree stem cell  
6 subpopulations have yet to be defined.

7         The intrahepatic stem cell niches comprise the ductal plates in fetal and neonatal  
8 developmental stages, transitioning to canals of Hering in pediatric and adult stages(18). They  
9 contain hepatic stem cells (7-9  $\mu\text{m}$ ), partnered tightly with angioblasts (positive expression for  
10 CD117, CD133, VEGF-receptor, and Van Willebrand Factor). The stem cells and their  
11 partners, angioblasts, are connected to hepatoblasts, that are partnered with endothelial cell  
12 precursors (positive expression for CD133, VEGF-receptor, Van Willebrand Factor, and  
13 CD31) and to stellate cell precursors (positive expression for CD146, ICAM-1, desmin, alpha-  
14 smooth muscle actin, beta-3-integrin and low levels of vitamin A but no glial fibrillary acidic  
15 protein-GFAP) (7, 18-21). The mesenchymal cells produce critical paracrine signals(21).

16         The hepatic stem cells in humans express SOX9, SOX17; low levels of pluripotency  
17 genes (OCT4, KLF4, NANOG); other stem cell markers (hedgehog proteins, CD44, ALDH,  
18 CD133); strong levels throughout the cell of EpCAM and NCAM but no alpha-fetoprotein  
19 (AFP) and minimal (if any) albumin (6, 7, 19, 21). Interestingly, telomerase protein is found  
20 entirely within the nucleus, and telomerase activity occurs at basal levels (22) .

21         These hepatic stem cells are precursors to hepatoblasts (10-12  $\mu\text{m}$ ) that are devoid of  
22 SOX17 (faint, if any, SOX9), devoid of the pluripotency genes and of NCAM, and yet  
23 expression of other stem cell markers (CD44, CD133, hedgehog proteins). Telomerase is  
24 found within the nucleus as well as cytoplasmically, and its activity levels are at least 5-fold  
25 higher than those in the hepatic stem cells (22). Positive strong expression is found in

1 hepatoblasts for AFP, LGR5, ICAM-1, and P450A7 but with EpCAM now confined to the  
 2 plasma membrane (7, 18, 19). In fetal and neonatal livers, the majority of the parenchymal cells  
 3 are hepatoblasts; in adult livers, the hepatoblasts are very few and found as individual cells  
 4 between stem cells and periportal hepatocytes or cholangiocytes (18, 23, 24). Known stages  
 5 for stem/progenitors are given below in a figure modified from one published previously (10,  
 6 11). (See also **Figure S3**).

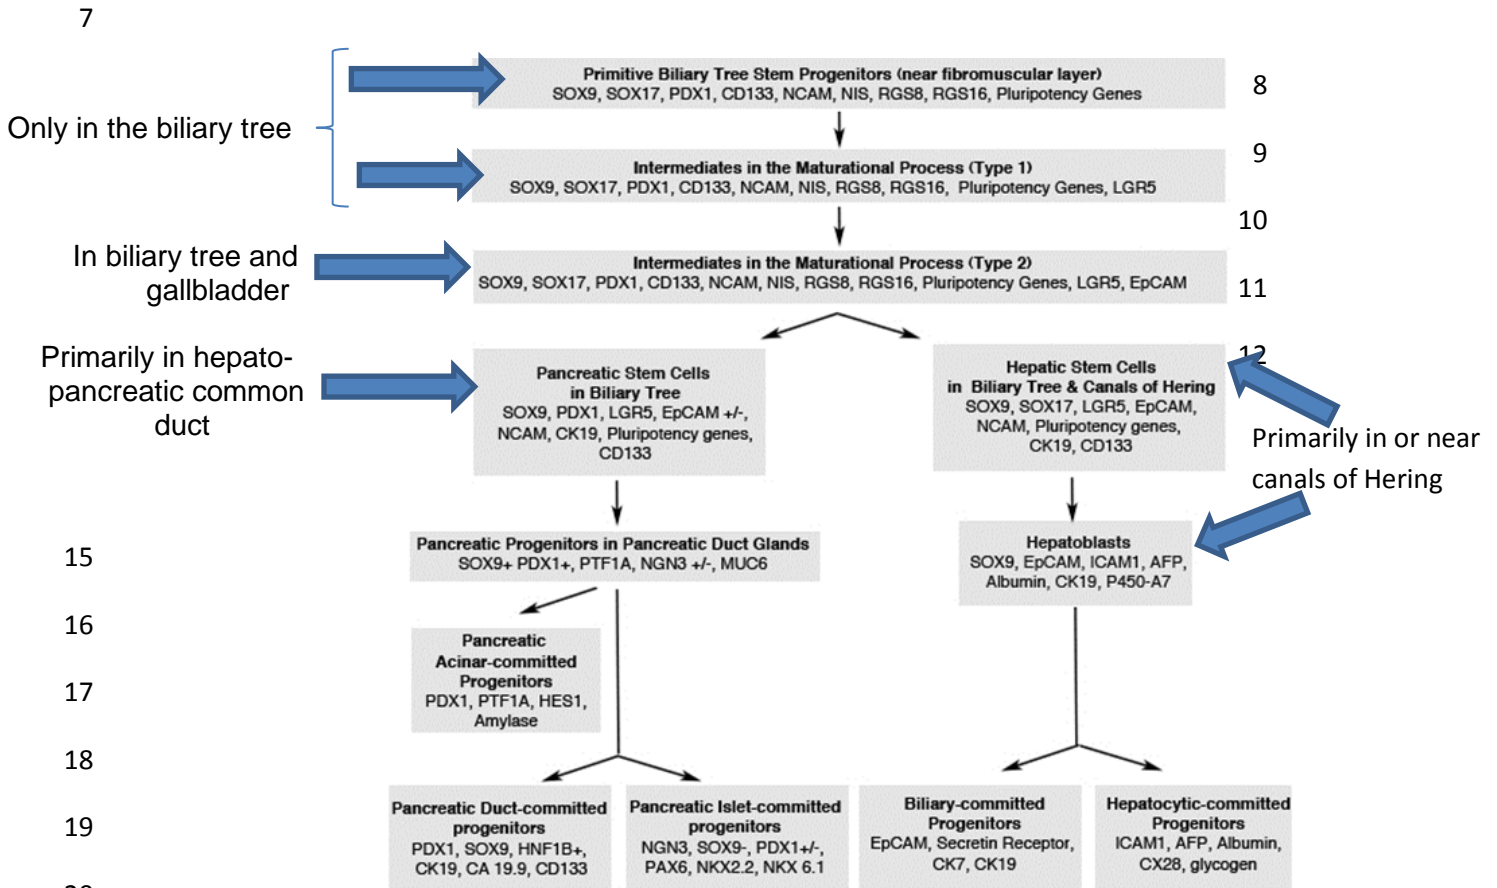

**Pluripotency genes** include: SOX2, OCT4, KLF4, NANOG, TROP-2, BMi-1, and SALL4. Cells at all stages express cytokeratins 8 and 18. NIS=sodium iodide symporter.

21 **Intrahepatic lineage stages**- The zonal distribution of the liver's known heterogeneity of  
 22 functions has been described extensively in the past and is summarized in a number of  
 23 articles and reviews (1, 2, 4, 6, 25-29) . Here is a brief summary of major changes in the  
 24 phenotypic traits and found in a zonal distribution pattern correlating with the maturational

1 lineages:

2

3 **Periportal parenchymal cells (zone 1)** in rats are comprised of “small hepatocytes”  
4 and intrahepatic biliary epithelia, or “large cholangiocytes”; these are entirely diploid  
5 and with diameters that are ~18  $\mu\text{m}$  for hepatocytes and ~14  $\mu\text{m}$  for cholangiocytes.

6 The hepatocytes form plates or cords of cells closely associated with sinusoidal  
7 endothelia that in zone 1 are continuous and linked to each other. The periportal  
8 hepatocytes peak in factors and enzymes associated with gluconeogenesis, amino acid  
9 and ammonia metabolism, urea synthesis, and glutathione peroxidase. Although many  
10 of the genes expressed are regulated fully transcriptionally and posttranscriptionally,  
11 there are some (e.g. transferrin) in which the mRNA is expressed but not translated  
12 and others (e.g. albumin) in which only some of the known transcriptional regulator  
13 mechanisms influencing albumin are operative.

14

15 **Midacinar parenchymal cells (zone 2)**. In rats, midacinar hepatocytes are tetraploid,  
16 are larger (>22-25  $\mu\text{m}$ ) and contain genes that all regulate fully both transcriptionally and  
17 posttranscriptionally. The mRNA for transferrin is expressed at most (possibly all?)  
18 early lineage stages, but there is no transferrin protein produced until the midacinar  
19 lineage stages, since critical factors needed for translation appear at these stages.

20 There are parallel examples of lineage dependence of particular transcription factors or  
21 factors needed for mRNA half-life and that become fully operative in the mid-acinar  
22 zone.

23

24 **Pericentral parenchymal cells (zone 3)** In rats, the pericentral zone contains  
25 hepatocytes that are a mix of tetraploid and octaploid cells, and comprise the largest

1 parenchymal cells in the liver (e.g. >30  $\mu$ M in rats). These transition to cells undergoing  
2 apoptosis and that are easily recognizable with TUNEL assays and others indicating  
3 DNA fragmentation (30, 31). The gene expression profile includes late P450s,  
4 glutathione transferases, UDP-glucuronyl-transferases, glutamine synthetase and  
5 heparin proteoglycans, and the zone 3 region is replete with Kupfer cells that are  
6 known to participate in removal of apoptotic cells. The endothelia of zone 3 are no  
7 longer continuous but rather are fenestrated such that the parenchymal cells are in  
8 direct contact via their extracellular matrix with blood. (32, 33).

## 9 **Methods**

10 **Materials.** Recombinant rat leukemia inhibitory factor (rat ESGRO®) and Bisbenzimidazole H  
11 33258 fluorochrome (Hoeschst stain) was purchased from EMD-Millipore (Billerica, MA).  
12 Optiprep™, Hyaluronic acid sodium salt from *Streptococcus equi*, Collagenase from *Clostridium*  
13 *histolyticum*, DNase from bovine pancreas and all additive components of Kubota's media (see  
14 below) except for zinc sulfate heptahydrate and L-glutamine were purchased from Sigma-  
15 Aldrich (St. Louis, MO). SpecPure® Zinc sulfate heptahydrate was purchased from Alfa Aesar  
16 (Ward Hill, MA). GIBCO® DMEM, RPMI 1640, L-glutamine and antibiotic / antimycotic cocktail  
17 and AlexaFluor conjugated secondary antibodies were purchased from Life Technologies  
18 (Grand Island, NY). Normal donkey serum was purchased from Jackson ImmunoResearch  
19 Laboratories (West Grove, PA). Suppliers for immunocytochemistry primary antibodies are  
20 listed in **Supplementary Table 1**. RLT Buffer and RNEasy Mini Kits were purchased from  
21 Qiagen (Germantown, MD). Applied Biosystems™ TaqMan® Gene Expression Assays and  
22 TaqMan® RNA-to-Ct™ 1-Step Kits were purchased from Life Technologies.

23 2,3,7,8-tetrachlorodibenzo-p-dioxin (TCDD) was purchased from AccuStandard (New  
24 Haven, CT). 6-formylindolo[3,2-b]carbazole (FICZ) was purchased from Enzo Life Sciences



1 (Exeter, UK). 3,3'-diindolylmethane (DIM) was purchased from Sigma-Aldrich. Chemicals  
2 structures for these agonists are presented in **Figure S1**.

3 Kubota's medium (KM) is a serum-free, wholly defined medium designed for endodermal  
4 stem/progenitors and was first developed in the isolation of rHBs (8, 34). It subsequently was  
5 found effective for expansion of human hepatic stem cells (hHpSCs) and hepatoblasts (hHBs)  
6 as well as for multiple subpopulations of human biliary tree stem cells (hBTSCs) (7, 14-19, 35,  
7 36). It is comprised of basal medium, low calcium, no copper, insulin, transferrin, and a mixture  
8 of lipids, and is devoid of cytokines or growth factors. KM contains RPMI 1640 media  
9 supplemented with the following: bovine serum *albumin* (1 mg/mL), L-glutamine (2 mM),  
10 nicotinamide (0.54 mg/mL), insulin (5 ug/mL), transferrin (10 ug/mL), hydrocortisone (100 nM),  
11 selenium (30 nM), zinc sulfate (1 nM),  $\beta$ -mercaptoethanol (50 uM), palmitic acid (31 mM),  
12 palmitoleic acid (2.8 mM), stearic acid (11.6 mM), oleic acid (13.4 mM), linoleic acid (35.6 mM)  
13 and linoleic acid (5.6 mM) plus an antibiotic / antimycotic cocktail. In culture, the growth of  
14 endodermal stem/progenitors from all species tested has been successful with KM. The  
15 clonogenic expansion of the HpSCs is dependent on partially identified and unidentified  
16 paracrine signals from angioblast feeders (but not stellate cell feeders) and that form close  
17 spatial associations with the expanding hepatic stem cell colonies (7, 21). The hepatoblasts  
18 have feeders of endothelial and stellate cell precursors that provide distinct matrix and soluble  
19 paracrine signals(20, 21, 34, 37, 38).

20

21 **Rat Hepatic Stem / Progenitor Cell Cultures.** Postnatal day 0-2 female Sprague Dawley rat  
22 livers were purchased from Charles River, Inc. (Wilmington, MA). Livers were stored in chilled  
23 Dulbecco's modified eagles medium (DMEM) supplemented with an antibiotic / antimycotic  
24 cocktail containing amphotericin B, streptomycin and penicillin (Life Technologies Inc., Grand

1 Island, NY) and processed within 2 h after harvest. Livers (n = 6-12 / preparation) were  
2 minced, and tissue was suspended in DMEM supplemented with 0.6 mg / mL Collagenase  
3 (~300 U/mL) and 0.3 mg / mL DNase. Tissue was then digested for 40 minutes at 34°C with  
4 intermittent mixing every 10 minutes. Cells were allowed to settle for the final 5 minutes of  
5 digestion. The supernatant was then transferred to a fresh tube, pelleted by centrifugation at  
6 250xg for 5 minutes, resuspended in fresh DMEM and stored at room temperature. Cells  
7 remaining in the original digestion tube were resuspended in fresh Collagenase / DNase media  
8 and digested for an additional 40 minutes at 34°C with intermittent mixing. Cells from the  
9 second digestion were pelleted by centrifugation at 250xg for 5 minutes, resuspended in fresh  
10 DMEM and combined with cells pelleted from the supernatant of the initial digestion. Cells were  
11 then filtered through a 70 µm nylon cell strainer and pelleted by centrifugation at 250xg for 5  
12 minutes. Cells were then resuspended in a chilled 34% Optiprep solution prepared using  
13 Kubota's media (KM) + 0.3 mg/mL DNase. Cells were then centrifuged at 1400xg for 15 minutes  
14 at 4°C. Cells present at the Optiprep interface were transferred to a fresh tube with a plastic  
15 Pasteur pipette, resuspended in KM and filtered through 40 µm nylon cell strainer. A small  
16 aliquot of cells was diluted 1:10 in KM + 0.04% Trypan blue and counted in a hemocytometer to  
17 determine cell concentrations in suspension. Trypan blue positive cells and red blood cells  
18 were excluded during cell counting.

19 On the day prior to culture, six-well culture plates were filled with a solution of 0.144  
20 mg/mL hyaluronic acid sodium salt (2 mL / well) in sterile de-ionized water and allowed to air-dry  
21 overnight in a laminar flow hood, resulting in a plating surface coated with 30 µg/cm<sup>2</sup>  
22 hyaluronan. Plates were re-hydrated with DMEM prior to seeding of cells. Cells were seeded at  
23 a density of 3x10<sup>6</sup> cells / well in KM containing recombinant rat leukemia inhibitory factor (LIF) at  
24 the concentrations specified in the individual experiments. Cells were allowed a 2 day  
25 attachment period. At 2 days *in vitro* (DIV) a media change with fresh KM + LIF was performed

1 to remove cells not bound to the plating surface. Additional media changes with KM + LIF were  
2 performed every 3 days.

3 In experiments examining the effects of aryl hydrocarbon receptor (AHR) agonists  
4 (TCDD, FICZ and DIM), dosing solutions of each chemical to be tested were prepared in 100%  
5 DMSO at a 1000x concentration. Chemicals were administered by addition of 1  $\mu$ L of dosing  
6 solution per 1 mL of media to be added to the well at time of media change. The DMSO  
7 concentration in treated and vehicle control wells was 0.1%. In experiments examining AHR  
8 activation via Cyp1a1 induction, chemical was administered at 12 days in culture in Kubota's  
9 media + 1 ng/mL LIF. Cultures were sampled at 4, 24, 48 and 96 h after dosing. In  
10 experiments examining the effects of AHR agonists on hepatic stem/progenitor cell growth,  
11 chemical was administered at 2 days in culture and re-administered at each media change (5,8  
12 and 11 days). Cultures were sampled at 12 days.

13

14 **Immunocytochemistry.** Media was aspirated and cultures were fixed in chilled methanol-  
15 acetone (1:1) for 10 minutes at 4°C. Cultures were then rinsed 3X with PBS and blocked for 1 h  
16 at 25°C with 5% normal donkey serum. Cultures were then rinsed 3X with PBS and incubated  
17 for 2 h at 25°C with primary antibodies diluted in PBS as described in Table S1. Cultures were  
18 rinsed with three times with PBS and incubated for 1 h at 25° C with a 1:1000 dilution of  
19 AlexaFluor conjugated donkey anti-IgG secondary antibodies diluted in PBS as listed in **Table**  
20 **S1**. Secondary antibody labeling solutions also contained 3  $\mu$ g / mL Hoechst 33528 for  
21 visualization of cell nuclei. Cultures were then rinsed 4X with PBS with the final rinse serving as  
22 a storage buffer. Plates were sealed with an adhesive film and stored at 4°C, protected from  
23 light, prior to imaging. Antibodies are listed in **Table S1**. For high content image analysis  
24 studies, cultures were labeled for albumin and E-cadherin with a Hoechst 33528 nucleus stain.

1  
2  
3  
4  
5  
6  
7  
8  
9  
10  
11  
12  
13  
14  
15  
16  
17  
18  
19  
20  
21  
22  
23  
24

**High Content Image Analysis.** High-content image analysis was performed on rat hepatic stem/progenitor cultures prepared in six-well plates and immunolabeled with E-cadherin-AlexaFluor 488, albumin-AlexaFluor 546, desmin-AlexaFluor 647 and Hoecsht 33528. Images were acquired using a BD Pathway 435 Bioimager (BD Biosciences, San Jose, CA) with an Olympus CPlanFI 10X (0.3 NA) objective. Within each well, 32 non-overlapping, unique fields-of-view were imaged across the plating surface. Matching 4 x 4 image montages were captured in each unique field-of-view, corresponding to the described fluorescent labels. Tagged image format (TIF) files were then analyzed using optimized Cellomics Morphology Explorer Bioapplication protocols (Thermo Scientific, Waltham, MA). Two protocols were designed for the purposes of the present study as described in **Figure S3** and **Figure S4**.

The first protocol utilized images of E-cadherin, albumin and Hoechst 33528 labeled cultures to quantify and characterize the growth of hepatic stem/progenitor cells (**Figure S3**). Hepatic stem/progenitor colonies were identified based upon E-cadherin labeling. Geometric and signal intensity-based measurements for each colony identified were reported for each individual colony. Measurements reported in the present study include colony area ( $\mu\text{m}^2$ , based on E-cadherin labeling), the number of stem/progenitor cells in a colony (based on the number of nuclei counted within each colony) and the fluorescent surface area density (FSAD) for both E-cadherin and albumin labeling. FSAD is a textural measurement which summarizes the intensity and variation in fluorescent pixel intensity across the area of an identified object. The second protocol utilized images of desmin and Hoechst 33528 labeled cells to quantify the growth of stellate precursor cells (**Figure S4**). Measurements of interest were areas of desmin-positive cells ( $\mu\text{m}^2$ ) and the total number of *desmin*-positive cells per well.

1 **Quantitative reverse transcription polymerase chain reaction (qRT-PCR) analysis.** At the  
2 time of sampling, media was aspirated from cultures and were lysed with 600  $\mu$ L of Qiagen RLT  
3 Buffer. Lysates were transferred to a RNase / DNase-free polypropylene tube and stored at -  
4 80°C prior to total RNA extraction. Total RNA was purified using a Qiagen RNEasy® Mini Kit  
5 according to manufacturer's protocol. Total RNA was eluted with DNase-free water and total  
6 RNA concentrations were quantified using a NanoDrop 2000 spectrophotometer (Thermo  
7 Scientific). Total RNA concentrations were then adjusted to an equivalent value with DNase-  
8 free water prior to qRT-PCR analysis. qRT-PCR was performed on an Applied Biosystems™  
9 7900HT Sequence Detection System (Life Technologies) using TaqMan® Gene Expression  
10 Assays and TaqMan® RNA-to-Ct™ 1-Step Kits according to manufacturer's recommended  
11 protocols. Reactions were performed in a 384-well plate at a 20  $\mu$ L reaction volume. Thermal  
12 cycling conditions were as follows: 48°C for 15 min followed by 95°C for 10 min and 40 cycles  
13 of 95°C for 15 sec and 60°C for 1 min.

14 Details of gene expression assays used in this study are listed in **Table S2**. Data were  
15 analyzed using the 2(-Delta Delta C(T)) method(39). *Rps18* was used as the internal reference  
16 gene in 2(-Delta Delta C(T)) calculations. Data are expressed as mean fold-change from  
17 calibrator samples as indicated in figure captions. 2(-Delta Delta C(T)) values were  $\log_{10}$   
18 transformed for statistical analysis using GraphPad Prism® software (La Jolla, CA).

19

20 **Statistics.** All statistics were performed using GraphPad Prism® software (La Jolla, CA).  
21 Details of statistical tests are described in figure legends.

22

23

1 **Table S1. Immunocytochemistry primary antibodies.**

| Primary Antibody        | Vendor              | Product ID | Host Species | Isotype                                       | Clone | Dilution | Secondary <sup>a</sup>                 |
|-------------------------|---------------------|------------|--------------|-----------------------------------------------|-------|----------|----------------------------------------|
| Albumin <sup>b</sup>    | Bethyl Laboratories | A110-134A  | sheep        | polyclonal                                    | n/a   | 1:1000   | <input type="checkbox"/> sheep<br>546  |
| EpCAM                   | Origene             | TA303586   | rabbit       | Polyclonal                                    | n/a   | 1:100    | <input type="checkbox"/> rabbit<br>488 |
| CD44                    | BD Pharmingen       | 554869     | mouse        | monoclonal<br>IgG2a, <input type="checkbox"/> | OX-49 | 1:1000   | <input type="checkbox"/> mouse<br>488  |
| E-cadherin <sup>b</sup> | BD Pharmingen       | 610182     | mouse        | monoclonal<br>IgG2a, <input type="checkbox"/> | 36    | 1:1000   | <input type="checkbox"/> mouse<br>488  |
| Desmin <sup>b</sup>     | Abcam               | ab8592     | rabbit       | Polyclonal                                    | n/a   | 1:1000   | <input type="checkbox"/> rabbit<br>488 |
| AFP                     | Santa Cruz          | sc-8108    | goat         | Polyclonal                                    | n/a   | 1:50     | <input type="checkbox"/> goat<br>546   |

2 <sup>a</sup> refers to AlexaFluor conjugated donkey IgG secondary antibodies utilized in quantitative  
3 imaging studies.

4 <sup>b</sup> primary antibodies utilized in high-content image analysis studies. Albumin, E-cadherin and  
5 desmin primary antibodies were used in conjunction with AlexaFluor 546, AlexaFluor 488 and  
6 AlexaFluor 647 donkey IgG antibodies, respectively.

1

2 **Table S2. TaqMan qRT-PCR gene expression assays**

| <b>Gene Symbol</b>        | <b>NCBI GenBank mRNA</b> | <b>TaqMan Assay ID</b> | <b>Exon Boundary</b> | <b>Amplicon Length</b> |
|---------------------------|--------------------------|------------------------|----------------------|------------------------|
| <i>Rps18</i> <sup>a</sup> | NM_213557.1              | Rn01428915_g1          | 3-4                  | 73                     |
| <i>EpCAM</i>              | NM_138541.1              | Rn01473202_m1          | 7-8                  | 117                    |
| <i>AFP</i>                | NM_012493.2              | Rn00560661_m1          | 3-4                  | 81                     |
| <i>Alb</i>                | NM_134326.2              | Rn00592480_m1          | 6-7                  | 96                     |
| <i>Ncam1</i>              | NM_031521.1              | Rn00580526_m1          | 14-15                | 66                     |
| <i>Sox17</i>              | NM_001107902.1           | Rn01749232_g1          | 3-4                  | 63                     |
| <i>Sox9</i>               | AB073720.1               | Rn01751069_mH          | 1-2                  | 60                     |
| <i>Ahr</i>                | NM_013149.2              | Rn00682057_m1          | 9-10                 | 67                     |
| <i>Ahrr</i>               | NM_001024285.1           | Rn01537444_m1          | 7-8                  | 153                    |
| <i>Cyp1a1</i>             | NM_012540.2              | Rn00487218_m1          | 2-3                  | 120                    |

3 <sup>a</sup> Internal control gene.

4

| <b>Supplement Table 3. Markers in Stem/Progenitors and their Descendants<br/>(findings identical in rats and humans except where indicated)</b> |                                                                                                                                                                 |                                                       |                                                       |                                                                                   |
|-------------------------------------------------------------------------------------------------------------------------------------------------|-----------------------------------------------------------------------------------------------------------------------------------------------------------------|-------------------------------------------------------|-------------------------------------------------------|-----------------------------------------------------------------------------------|
|                                                                                                                                                 | <b>Maturational Lineage Stages from<br/>Primitive Stem Cells  Adult Cells</b> |                                                       |                                                       |                                                                                   |
| <b>Epithelia</b>                                                                                                                                | <b>Biliary Tree Stem Cell Subpopulations (BTSCs)*</b>                                                                                                           | <b>Intra-hepatic Stem Cells (HpSCs)</b>               | <b>Hepatoblasts (HBs)</b>                             | <b>Hepatocytes and Cholangiocytes</b>                                             |
| <b>Mesenchymal Cell Partners</b>                                                                                                                | <b>Not yet defined</b>                                                                                                                                          | <b>Angioblasts</b>                                    | <b>Precursors to endothelia and to stellate cells</b> | <b>Sinusoidal endothelia-hepatocytes; stages of stellate cells-cholangiocytes</b> |
| <b>Marker(s)</b>                                                                                                                                | <b>Expression of the marker(s) in the epithelial lineage stages</b>                                                                                             |                                                       |                                                       |                                                                                   |
| SOX 9                                                                                                                                           | Positive                                                                                                                                                        |                                                       |                                                       | Not expressed                                                                     |
| SOX 17                                                                                                                                          | Strongly expressed                                                                                                                                              | Moderate levels in humans; variably expressed in rats | Negative                                              | Negative                                                                          |
| PDX1                                                                                                                                            | Positive                                                                                                                                                        | Negative                                              |                                                       |                                                                                   |
| Pluripotency genes**                                                                                                                            | Strongly expressed                                                                                                                                              | Moderate levels                                       | Negative                                              | Negative                                                                          |
| Cytokeratins 8, 18                                                                                                                              | Positive at all stages                                                                                                                                          |                                                       |                                                       |                                                                                   |
| Cytokeratin 19                                                                                                                                  | Positive                                                                                                                                                        |                                                       |                                                       | Found on mature biliary epithelia but not on mature hepatocytes                   |
| Cytokeratin 7                                                                                                                                   | Negative                                                                                                                                                        |                                                       | Positive                                              | Found in biliary epithelia but not hepatocytes                                    |
| <i>E-cadherin</i>                                                                                                                               | Positive but with various patterns of expression that are lineage-stage specific                                                                                |                                                       |                                                       |                                                                                   |
| CD133                                                                                                                                           | Positive at all stem/progenitor cell stages; levels of expression decline with maturation                                                                       |                                                       |                                                       | Negative                                                                          |
| Hedgehog proteins (Indian, Sonic) and their receptor, patched                                                                                   |                                                                                                                                                                 |                                                       |                                                       | Negative                                                                          |
| Telomerase                                                                                                                                      | Not yet assayed in BTSCs                                                                                                                                        | Protein entirely in nucleus; basal                    | Found partially in nucleus and                        | protein found entirely in cytoplasm. No activity                                  |



|                                                                    |                                                                                           |                                                             |                                                     |                                                                                                                      |
|--------------------------------------------------------------------|-------------------------------------------------------------------------------------------|-------------------------------------------------------------|-----------------------------------------------------|----------------------------------------------------------------------------------------------------------------------|
|                                                                    |                                                                                           | level of telomerase activity                                | cytoplasm; telomerase activity 5X higher            | except in regenerative responses; assumption that some telomerase is translocated to the nucleus during regeneration |
| LGR5                                                               | Most BTSC subpopulations are negative; those that are positive are at intermediate stages | Positive                                                    | Positive/weak                                       | Negative                                                                                                             |
| <i>EpCAM</i>                                                       |                                                                                           | Found throughout the cell                                   | Found only at the plasma membrane                   | Found on mature biliary epithelia                                                                                    |
| NCAM                                                               | positive                                                                                  |                                                             | Negative                                            | Negative                                                                                                             |
| ICAM-1                                                             | Negative                                                                                  | Negative                                                    | Positive on epithelia and on sinusoidal endothelia) | Positive (levels increase with maturation)                                                                           |
| <i>Albumin</i>                                                     | Negative                                                                                  | Minimal levels (if any); variable numbers of cells positive | All cells are positive (albeit at low levels)       | much higher levels in hepatocytes but not expressed in biliary epithelia                                             |
| Alpha-fetoprotein                                                  | Negative                                                                                  | Negative                                                    | Strongly expressed                                  | Negative                                                                                                             |
| Transferrin                                                        | Not yet assayed                                                                           | Positive for transferrin mRNA but not for the protein       |                                                     | Positive for both mRNA and protein                                                                                   |
| Connexins                                                          | Not yet assayed                                                                           | None                                                        | Connexins 28 and 43                                 | Connexin 32                                                                                                          |
| P450s                                                              | Not yet assayed                                                                           | None                                                        | P450A7                                              | P450s 3A and many others (zonal distribution)                                                                        |
| Endothelial cell Markers (e.g. CD31, Von Willebrand Factor)        | Negative                                                                                  |                                                             |                                                     |                                                                                                                      |
| Hemopoietic cell markers (e.g. CD34, CD45, red blood cell antigen) | Negative                                                                                  |                                                             |                                                     |                                                                                                                      |
| Mesenchymal Cell Markers                                           | Negative                                                                                  |                                                             |                                                     |                                                                                                                      |

|                                                                                                                                                                                                                                                                                                |  |
|------------------------------------------------------------------------------------------------------------------------------------------------------------------------------------------------------------------------------------------------------------------------------------------------|--|
| (e.g. <i>desmin</i> ,<br>alpha-smooth<br>muscle actin,<br>CD146, CD90)                                                                                                                                                                                                                         |  |
| <p>There are at least 3 major lineage stages of biliary tree stem cell subpopulations, and more are being identified with ongoing studies; these transition to either hepatic stem cells or pancreatic stem cells. See schematic of the subpopulations on page 6</p>                           |  |
| <p>**Pluripotency genes: OCT4, SOX2, NANOG, KLF4, SALL4</p>                                                                                                                                                                                                                                    |  |
| <p>The findings summarized above are either from the studies reported in this manuscript or are those from prior reports on rodent livers (20, 34, 40, 41) or on human livers (7, 18, 19, 22, 37, 38, 42, 43) or human biliary tree (9, 14, 15, 17) . See also in recent reviews (6, 9-11)</p> |  |

1  
2

- 1 **Fig. S1. Chemical structures of AHR agonists.** (A) 2,3,7,8-tetrachlorodibenzo-p-dioxin  
2 (TCDD), B) 6-formylindolo[2,3-b]carbazole (FICZ), C) 3,3'-diindolylmethane (DIM).

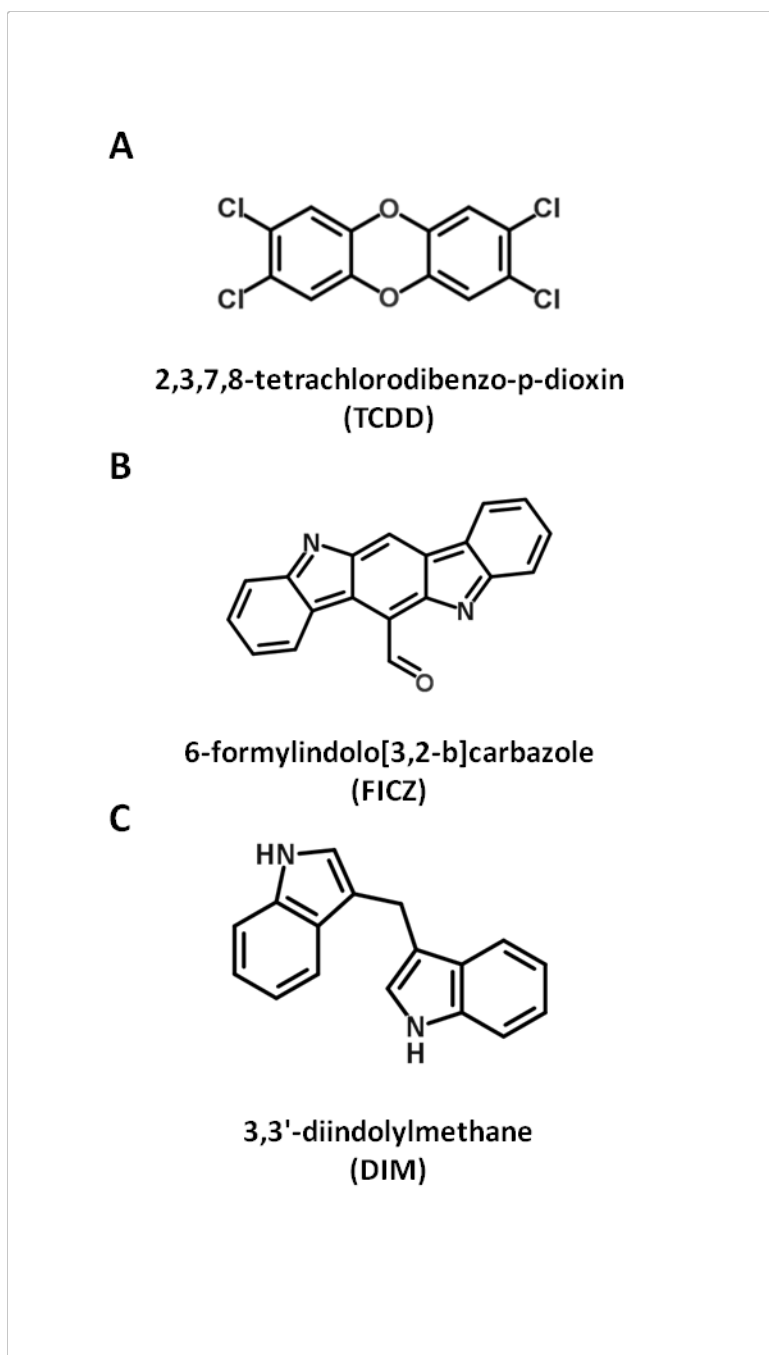

3

4

5

1 **Fig. S2. Schematic of AHR Signaling.(44-54)**

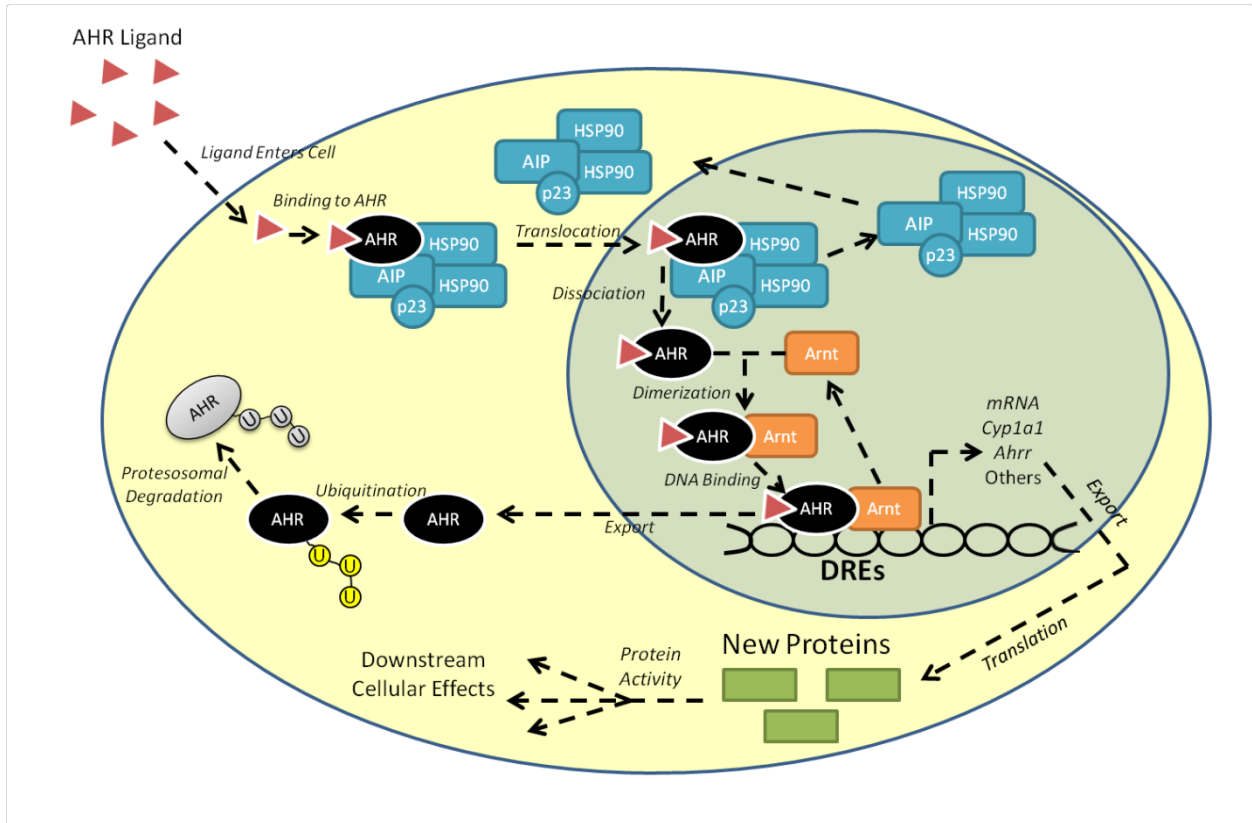

2

3

4

5

6

7

8

9

10

1 **Fig. S3. Quantitative analysis of rat hepatic stem/progenitor cell growth in the presence**  
2 **of leukemia inhibitory factor.** Rat hepatic stem / progenitors were cultured on 30  $\mu\text{g}/\text{cm}^2$   
3 hyaluronan in KM plus varying concentrations of LIF for 3, 6, 9 or 12 days *in vitro*. At each time  
4 point, cultures were sampled and immunolabeled with E-cadherin (green), albumin (red) and  
5 Hoechst 33528 to visualize nuclei (blue). (A) Pseudo-colored composite image. (B) E-cadherin  
6 image. (C) E-cadherin object identification: E-cadherin labeling was used to identify hepatic  
7 stem/progenitor colonies as bright objects on a dark background. Fluorescent intensity and  
8 geometric gating parameters were set to reliably trace the border of E-cadherin+ colonies (blue  
9 outlines = selected objects). Fluorescent intensity measurements for E-cadherin were also  
10 calculated within each selected object mask and used at later stages of analysis. (D) Albumin  
11 image. (E) Albumin intensity quantification: positional coordinates from the E-cadherin trace  
12 were super-imposed upon the albumin image in order to obtain fluorescent intensity  
13 measurements used at later stages of analysis. (F) Nucleus image. (G) Nucleus identification:  
14 positional coordinates from the E-cadherin trace were super-imposed upon the nucleus image.  
15 Nuclei contained within the mask for each selected colony were identified as bright objects on a  
16 dark background (green mask) and counted.

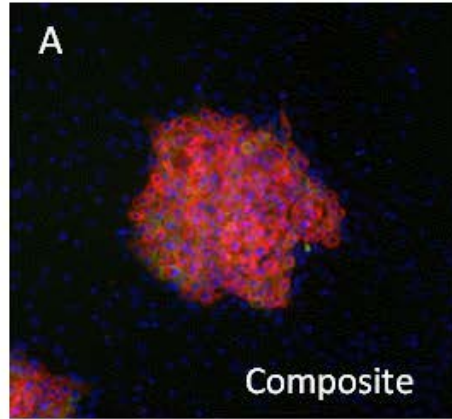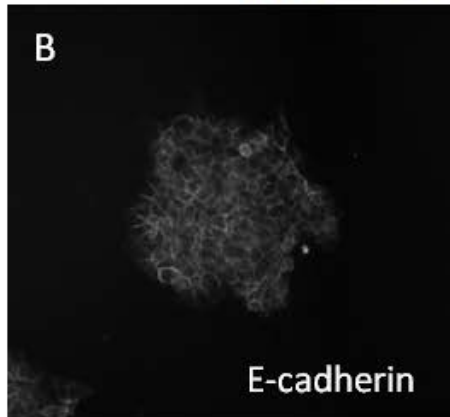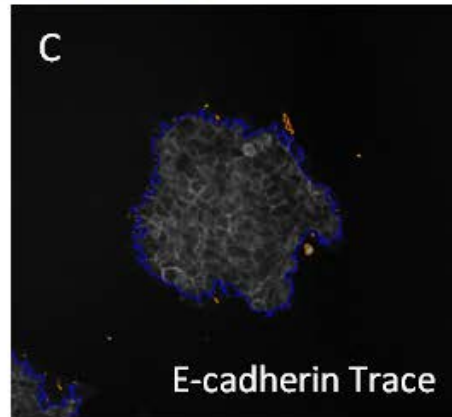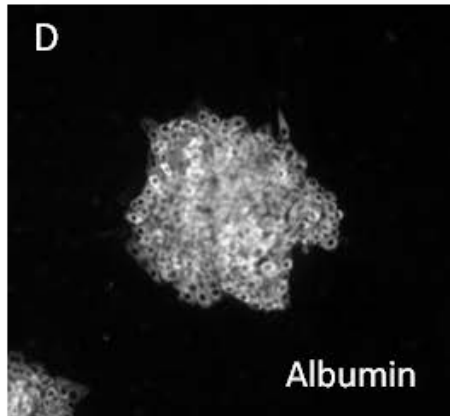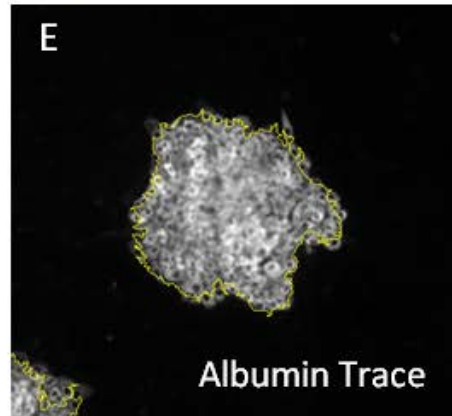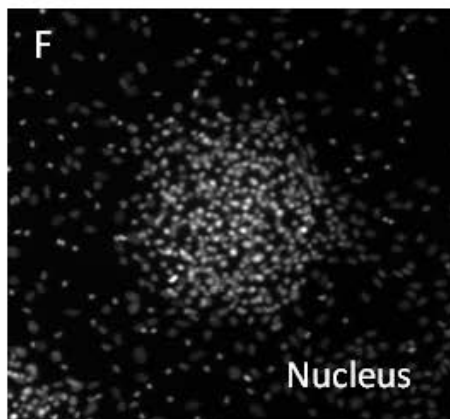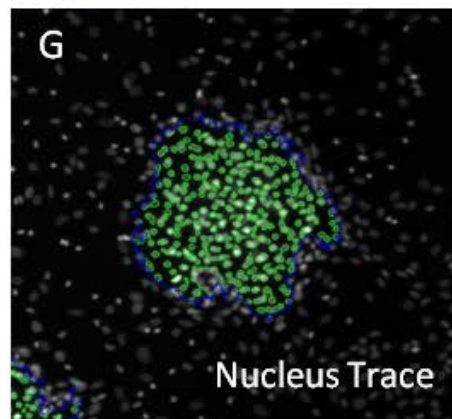

1 **Fig. S4. Quantitative analysis of rat stellate precursor cell growth in the presence of**  
2 **leukemia inhibitory factor.** Rat hepatic stem / progenitors were cultured on 30  $\mu\text{g}/\text{cm}^2$   
3 hyaluronan in KM plus varying concentrations of LIF for 3, 6, 9 or 12 days *in vitro*. At each time  
4 point, cultures were sampled and immunolabeled with desmin (yellow) + Hoechst 33258 to  
5 visualize nuclei (cyan). (A) Pseudo-colored composite image. (B) Desmin image. (C) Desmin  
6 object identification: desmin+cells were identified as bright objects on a dark background.  
7 Fluorescent intensity and geometric gating parameters were set to reliably trace desmin-positive  
8 cells (blue outlines = selected objects). Small areas of green immunofluorescence which did not  
9 correspond to a definitive nucleus were excluded from analysis (orange outlines = rejected  
10 objects). (D) Nucleus image. (E) Nucleus identification: positional coordinates from the desmin  
11 trace were super-imposed upon the nucleus image. Nuclei contained within a selected desmin+  
12 cell were quantified (red mask).

13

14

15

16

17

18

19

20

21

22

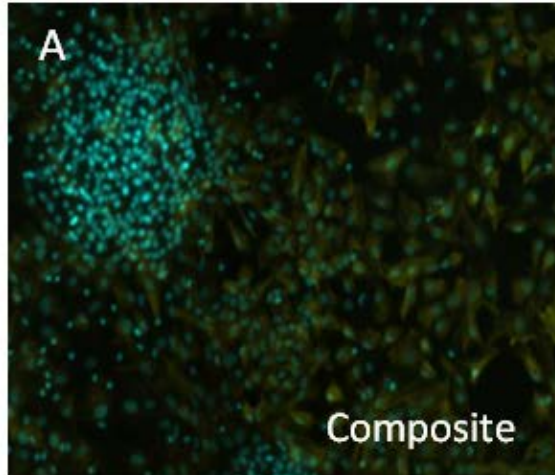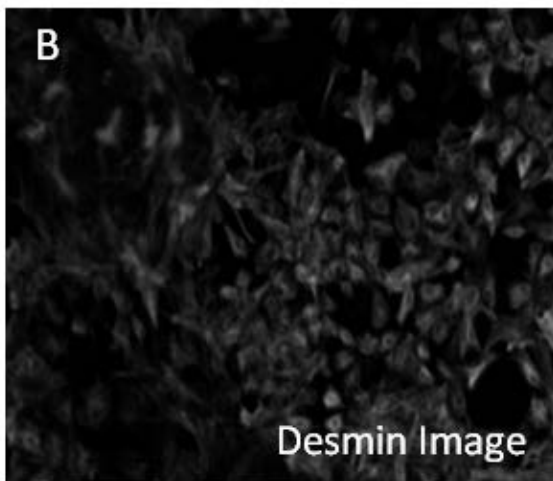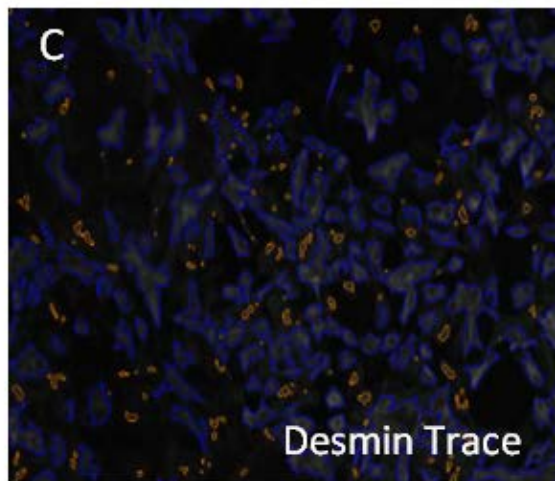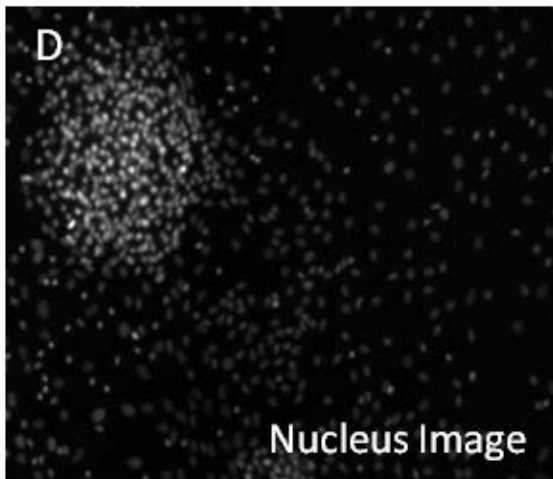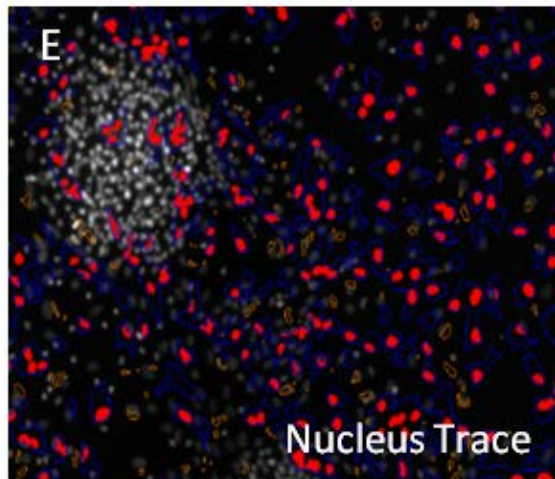

1

2

3



1

2 **Fig. S5. Growth rat hepatic stem/progenitor cultures on tissue culture plastic, collagen III**

3 **or collagen IV.** Rat hepatic stem / progenitors were cultured on either tissue culture plastic (top

4 row), 5  $\mu\text{g}/\text{cm}^2$  collagen III (middle row) or 5  $\mu\text{g}/\text{cm}^2$  collagen IV (bottom row) for 3 (left column),

5 7 (middle column) or 10 (right column) days *in vitro*. Cells were plated in serum-free Kubota's

6 media and allowed a 48 h attachment period at which time, unattached cells were rinsed away.

7 Growth of the culture was monitored using phase-contrast microscopy. The panels are

8 representative images of epithelial cell clusters (arrows) and surrounding mesenchymal

9 (arrowhead) or endothelial (asterisk) cells. In each case, mesenchymal and/or endothelial cell

10 overgrowth of cultures occurred and epithelial cell growth was limited. Scale bar = 100  $\mu\text{m}$ .

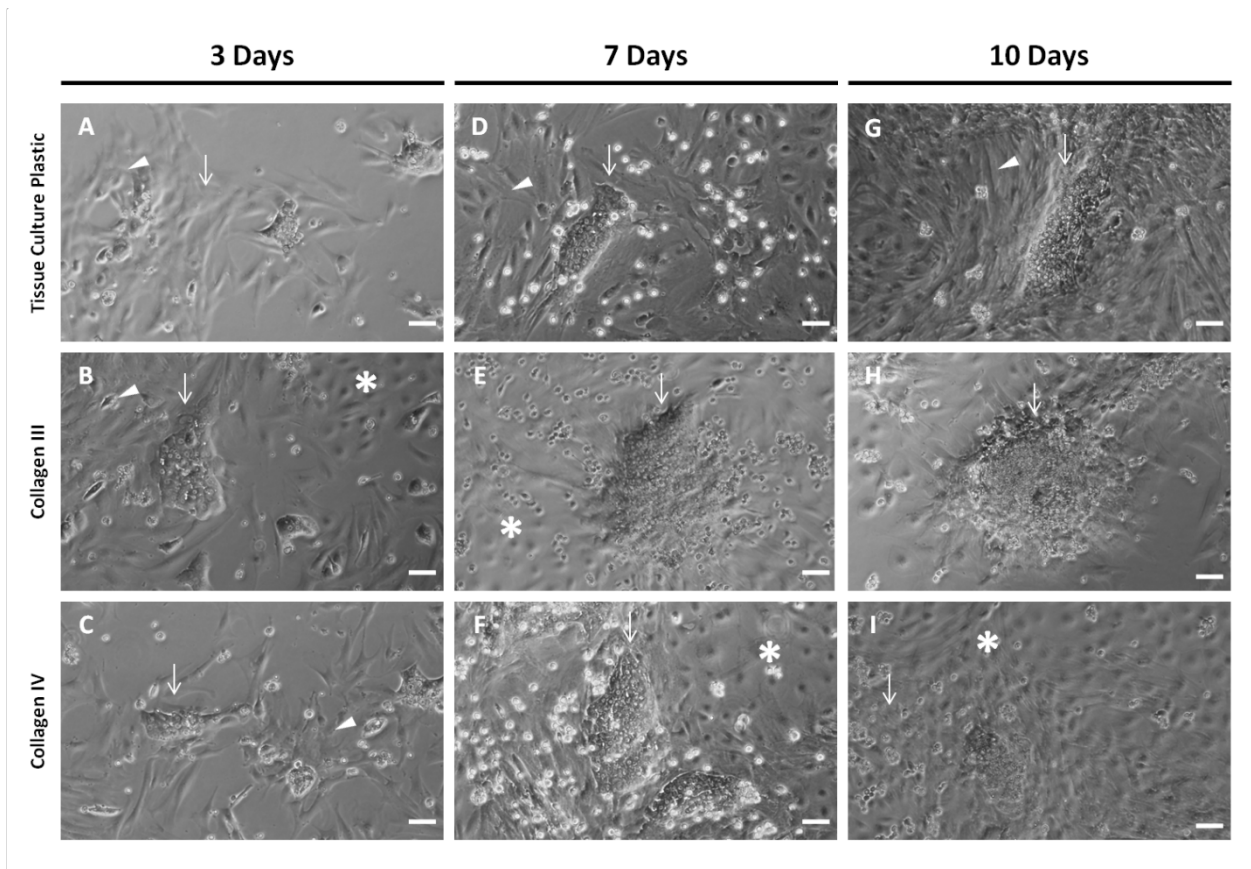

11

12

1

2 **Fig S6. Expression patterns of hepatic stem/progenitor cell markers in adult rat**  
3 **hepatocytes.** Images are matching phase contrast and pseudocolored fluorescent images. (A-  
4 A') CD44H. (B-B') E-Cadherin. (C-C') EpCAM. (D-D') AFP. (E-E') Albumin. (F-F') Desmin.  
5 Scale bar = 50  $\mu\text{m}$ .

6

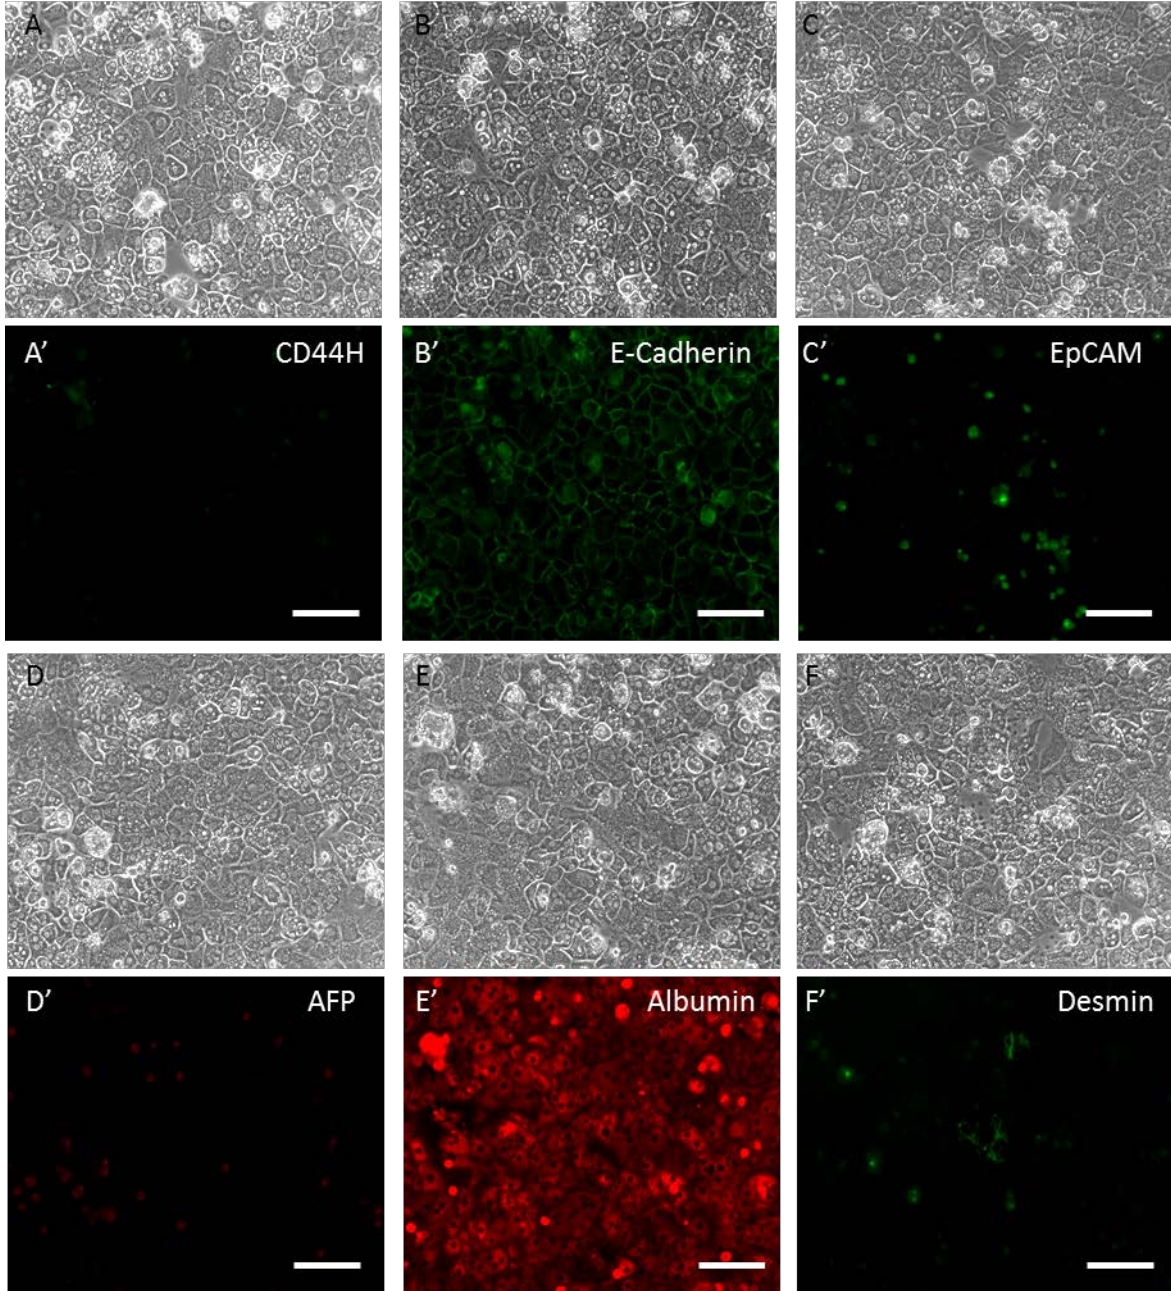

1

2

## References

1. Gumucio JJ, editor. Hepatocyte heterogeneity and liver function. Madrid: Springer International; 1989.
2. Traber PG, Chianale J, Gumucio JJ. Physiologic significance and regulation of hepatocellular heterogeneity [see comments]. *Gastroenterology* 1988;95:1130-1143.
3. Jungermann K, Katz N. Functional specialization of different hepatocyte populations. [Review] [387 refs]. *PHYSIOLOGICAL REVIEWS* 1989;69:708-764.
4. Gebhardt R. Heterogeneous intrahepatic distribution of glutamine synthetase. *Acta Histochem Suppl* 1990;40:23-28.
5. Gebhardt R, Lindros K, Lamers WH, Moorman AF. Hepatocellular heterogeneity in ammonia metabolism: demonstration of limited colocalization of carbamoylphosphate synthetase and glutamine synthetase. *Eur J Cell Biol* 1991;56:464-467.
6. Turner R, Lozoya O, Wang YF, Cardinale V, Gaudio E, Alpini G, Mendel G, et al. Hepatic stem cells and maturational liver lineage biology. *Hepatology* 2011;53:1035-1045.
7. \*Schmelzer E, \*Zhang L, Bruce A, E. W, Ludlow J, Yao H, Moss N, et al. Human hepatic stem cells from fetal and postnatal donors. *Journal of Experimental Medicine* 2007;204:1973-1987. (\*co-equal first authors)
8. Wauthier E, McClelland R, Turner W, Schmelzer E, Kubota H, Zhang L, Ludlow J, et al. Hepatic stem cells and hepatoblasts: identification, isolation and *ex vivo* maintenance *Methods for Cell Biology (Methods for Stem Cells)* 2008;86:137-225.
9. Cardinale V, Wang Y, Gaudio E, Carpino G, Mendel G, Alpini G, Reid LM, et al. The Biliary Tree: a Reservoir of Multipotent Stem Cells. *Nature Reviews-Gastroenterology and Hepatology* 2012;9:231-240.
10. Furth ME, Wang Y, Cardinale V, Carpino G, Lanzoni G, Cui C-B, Wauthier E, et al.: Stem Cell Populations Giving Rise to Liver, Biliary Tree and Pancreas. In: Sell S, ed. *The Stem*

- 1 Cells Handbook, 2nd Edition. Volume In Press. New York City, New York: Springer Science  
2 Publishers, NY, NY, 2013.
- 3 11. Lanzoni G, Cui C, Oikawa T, Wang Y, Carpino G, Cardinale V, Gabriel M, et al. Clinical  
4 Programs of Stem Cell Therapies for Liver and Pancreas. *Stem Cells* 2013;In Press.
- 5 12. Alpini G, Roberts S, Kuntz SM, Ueno Y, Gubba S, Podila PV, LeSage G, et al.  
6 Morphological, molecular, and functional heterogeneity of cholangiocytes from normal rat liver.  
7 *Gastroenterology* 1996;10:1636-1643.
- 8 13. Alpini G, Glaser S, Robertson W, Rodgers RE, Phinizy JL, Lasater J, LeSage GD. Large  
9 but not small intrahepatic bile ducts are involved in secretin-regulated ductal bile secretion. *The*  
10 *American Journal of Physiology*. 1997;272:G1064-G1074.
- 11 14. Carpino G, Cardinale V, Gentile R, Onori P, Semeraro R, Franchitto A, Wang Y, et al.  
12 Human gallbladder contains multipotent stem/progenitor cells. *Journal of Hepatology*  
13 2014;60:1194-2020.
- 14 15. \*Carpino G, \*Cardinale V, Onori P, Franchitto A, Bartolomeo Berloco P, Rossi M, Wang  
15 Y, et al. Biliary tree stem/progenitor cells in glands of extrahepatic and intrahepatic bile ducts: an  
16 anatomical *in situ* study yielding evidence of maturational lineages. *Journal of Anatomy*  
17 2012;220:186-199. (\*co-equal first authors)
- 18 16. Wang Y, \*Lanzoni G, \*Carpino G, Cui C, Dominguez-Bendala J, Wauthier E, Cardinale  
19 V, et al. Biliary Tree Stem Cells, Precursors to Pancreatic Committed Progenitors: Evidence for  
20 Life-long Pancreatic Organogenesis. . *Stem Cells* 2013;31:1966-1979. . (\*co-equal authors0
- 21 17. \*Cardinale V, \*Wang Y, Carpino G, Cui C, Inverardi L, Dominguez-Bendala J, Ricordi C,  
22 et al. Multipotent stem cells in the extrahepatic biliary tree give rise to hepatocytes, bile ducts  
23 and pancreatic islets. *Hepatology* 2011;54:2159-2172. (\*co-equal first authors)
- 24 18. Zhang L, Theise N, Chua M, Reid LM. Human hepatic stem cells and hepatoblasts:  
25 Symmetry between Liver Development and Liver Regeneration. *Hepatology* 2008;48:1598-  
26 1607.

- 1 19. Schmelzer E, Wauthier E, Reid LM. Phenotypes of pluripotent human hepatic  
2 progenitors. *Stem Cell* 2006;24:1852-1858.
- 3 20. Kubota H, Yao H, Reid LM. Identification and characterization of vitamin A-storing cells  
4 in fetal liver. *Stem Cell* 2007;25:2339-2349.
- 5 21. Wang Y, Yao H, Barbier C, Wauthier E, Cui C, Moss N, Yamauchi M, et al. Lineage-  
6 Dependent Epithelial-Mesenchymal Paracrine Signals Dictate Growth versus Differentiation of  
7 Human Hepatic Stem Cells to Adult Fates. *Hepatology* 2010;52:1443-1454.
- 8 22. Schmelzer E, Reid LM. Telomerase activity in human hepatic stem cells , hepatoblasts  
9 and hepatocytes from neonatal, pediatric, adult and geriatric donors. *European Journal of*  
10 *Hepatology and Gastroenterology* 2009;21:1191-1198.
- 11 23. Theise ND, Saxena R, Portmann BC, Thung SN, Yee H, Chiriboga L, Kumar A, et al.  
12 The canals of Hering and hepatic stem cells in humans. *Hepatology* 1999;30:1425-1433.
- 13 24. Kuwahara R, Kofman AV, Landis CS, Swenson ES, Barendswaard E, Theise ND. The  
14 hepatic stem cell niche: identification by label retaining cell assay. *Hepatology* 2008;47:1994-  
15 2002.
- 16 25. Lindros KO, Oinonen T, Issakainen J, Nagy P, Thorgeirsson SS. Zonal distribution of  
17 transcripts of four hepatic transcription factors in the mature rat liver. *Cell Biol Toxicol*  
18 1997;13:257-262.
- 19 26. Lindros KO. Zonation of cytochrome P450 expression, drug metabolism and toxicity in  
20 liver. *General Pharmacology: The Vascular System* 1997;28:191-196.
- 21 27. Gebhardt R, Alber J, Wegner H, Mecke D. Different drug metabolizing capacities in  
22 cultured periportal and pericentral hepatocytes. *Biochem Pharmacol* 1994;48:761-766.
- 23 28. Jungermann K, Kietzmann T. Zonation of parenchymal and nonparenchymal metabolism  
24 in liver. *Annual Review on Nutrition* 1996;16:179-203.
- 25 29. Jungermann K. Functional heterogeneity of periportal and perivenous hepatocytes.  
26 [Review] [135 refs]. *Enzyme* 1986;35:161-180.

- 1 30. Sigal SH, Gupta S, Gebhard DF, Jr., Holst P, Neufeld D, Reid LM. Evidence for a  
2 terminal differentiation process in the rat liver. *Differentiation* 1995;59:35-42.
- 3 31. Sigal SH, Rajvanshi P, Gorla GR, Sokhi RP, Saxena R, Gebhard DR, Jr., Reid LM, et al.  
4 Partial hepatectomy-induced polyploidy attenuates hepatocyte replication and activates cell  
5 aging events. *American Journal of Physiology - Gastrointestinal and Liver Physiology*  
6 1999;276:G1260-1272.
- 7 32. Twisk J, Hoekman MF, Mager WH, Moorman AF, de Boer PA, Scheja L, Princen HM, et  
8 al. Heterogeneous expression of cholesterol 7 alpha-hydroxylase and sterol 27-hydroxylase  
9 genes in the rat liver lobulus. *J Clin Invest* 1995;95:1235-1243.
- 10 33. Kuo FC, Darnell JE, Jr. Evidence that interaction of hepatocytes with the collecting  
11 (hepatic) veins triggers position-specific transcription of the glutamine synthetase and ornithine  
12 aminotransferase genes in the mouse liver. *Mol Cell Biol* 1991;11:6050-6058.
- 13 34. Kubota H, Reid LM. Clonogenic hepatoblasts, common precursors for hepatocytic and  
14 biliary lineages, are lacking classical major histocompatibility complex class I antigens. *Proc.*  
15 *Natl. Acad. Sci. (USA)* 2000;97:12132-12137.
- 16 35. McClelland R, Wauthier E, Zhang L, Barbier C, Melhem A, Schmelzer E, Reid LM. *Ex*  
17 *vivo* conditions for self-replication of human hepatic stem cells *Tissue Engineering* 2008;14:1-  
18 11.
- 19 36. Semeraro R, Carpino G, Cardinale V, Onori P, Gentile R, Cantafora A, Franchitto A, et  
20 al. Multipotent Stem/Progenitor Cells in the Human Foetal Biliary Tree. *Journal of Hepatology*  
21 2012;220 186-199.
- 22 37. Turner WS, Schmelzer E, McClelland R, Wauthier E, Chen W, Reid LM. Human  
23 hepatoblast phenotype maintained by hyaluronan hydrogels. *Journal of Biomedical Materials*  
24 2007;82:156-168.

- 1 38. Turner WS, Seagle C, Galanko J, Favorov O, Prestwich GD, Macdonald JM, Reid LM.  
2 Metabolomic Footprinting of Human Hepatic Stem cells and Hepatoblasts Cultured in  
3 Engineered Hyaluronan-Matrix Hydrogel Scaffolds. *Stem Cell* 2008;26:1547-1555.
- 4 39. Livak KJ, Schmittgen TD. Analysis of relative gene expression data using real-time  
5 quantitative PCR and the  $2^{-\Delta\Delta C_T}$  Method. *Methods* 2001;25:402-.
- 6 40. Sigal SH, Brill S, Reid LM, Zvibel I, Gupta S, Hixson D, Faris R, et al. Characterization  
7 and enrichment of fetal rat hepatoblasts by immunoadsorption ("panning") and fluorescence-  
8 activated cell sorting. *Hepatology* 1994;19:999-1006.
- 9 41. Kubota H, Storms RW, Reid LM. Variant forms of alpha-fetoprotein transcripts  
10 expressed in human hematopoietic progenitors. Implications for their developmental potential  
11 towards endoderm. *Journal of Biological Chemistry* 2002;277:27629-27635.
- 12 42. Schmelzer E, Reid LM. EpCAM Expression in Normal, Non-Pathological Tissues.  
13 *Frontiers in Biosciences* 2008;13:3096-3100.
- 14 43. Oikawa T, \*Kamiya A, Zeniya M, Chikada H, Hyuck AD, Yamazaki Y, Wauthier E, et al.  
15 SALL4, a stem cell biomarker in liver cancers. *Hepatology* 2013;57:1469-1483.
- 16 44. Gu YZ, Hogenesch JB, Bradfield CA. The PAS superfamily: sensors of environmental  
17 and developmental signals. *Annual Review in Pharmacology and Toxicology* 2000;40:519-561.
- 18 45. Beischlag TV, Luis Morales J, Hollingshead BD, Perdew GH. The aryl hydrocarbon  
19 receptor complex and the control of gene expression. *Critical Reviews of Eukaryotic Gene*  
20 *Expression* 2008;18:207-250.
- 21 46. Hankinson O. The aryl hydrocarbon receptor complex. *Annual Reviews in Pharmacology*  
22 *and Toxicology* 1995;35:307-340.
- 23 47. Ikuta T, Tachibana T, Watanabe J, al. e. Nucleocytoplasmic shuttling of the aryl  
24 hydrocarbon receptor. *Journal of Biochemistry* 2000;127:503-509.
- 25 48. Denison MS, Fisher JM, Whitlock JP, Jr. Protein-DNA interactions at recognition sites for  
26 the dioxin-Ah receptor complex. *Journal of Biological Chemistry* 1989;264:16478-16482.



- 1 49. Denison MS, Soshilov AA, He G, DeGroot DE, Zhao B. Exactly the same but different:  
2 promiscuity and diversity in the molecular mechanisms of action of the aryl hydrocarbon (dioxin)  
3 receptor. *Toxicology Science* 2011;124:1-22.
- 4 50. Durrin LK, Jones PB, Fisher JM, Galeazzi DR, Whitlock JPJ. 2,3,7,8-  
5 Tetrachlorodibenzo-p-dioxin receptors regulate transcription of the cytochrome P1-450 gene.  
6 *Journal of Cell Biochemistry* 1987;35:153-160.
- 7 51. Quattrochi LC, Vu T, Tukey RH. The human CYP1A2 gene and induction by 3-  
8 methylcholanthrene. A region of DNA that supports AH-receptor binding and promoter-specific  
9 induction. *Journal of Biological Chemistry* 1994;269:6949-6954.
- 10 52. Baba T, Mimura J, Gradin K, Kuroiwa A, Watanabe T, Matsuda Y, Inazawa J, et al.  
11 Structure and expression of the Ah receptor repressor gene. *Journal of Biological Chemistry*  
12 2001;276:33101-33110.
- 13 53. Prochazkova J, Kabatkova M, Bryja V, Umannová L, Bernatík O, Kozubík A, Machala M,  
14 et al. The interplay of the aryl hydrocarbon receptor and beta-catenin alters both AhR-  
15 dependent transcription and Wnt/beta-catenin signaling in liver progenitors. *Toxicol Sciences*  
16 2011;122:249-360.
- 17 54. Prochazkova J, Kozubik A, Machala M, Vondráček J. Differential effects of indirubin and  
18 2,3,7,8-tetrachlorodibenzo-p-dioxin on the aryl hydrocarbon receptor (AhR) signaling in liver  
19 progenitor cells. *Toxicology* 2011;279:146-154.
- 20
